# Supplementary material
Source: PubMed Central journal article supplement (PMC3832999)
Supplement: NIHMS527253-supplement-suuplementary_data.pdf [file NIHMS527253-supplement-suuplementary_data.pdf]

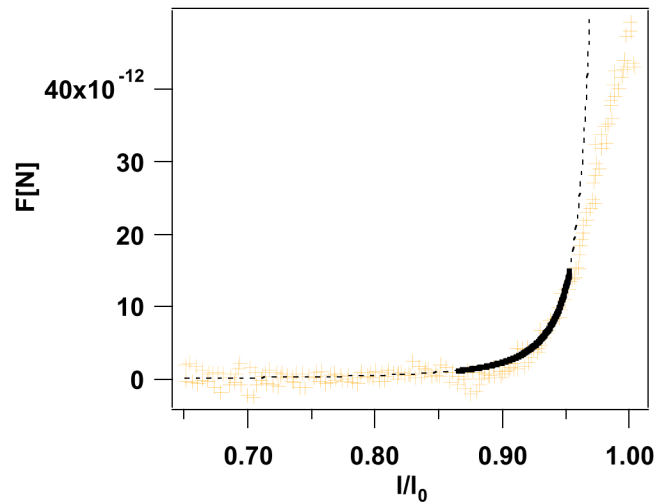

**Supplementary Figure 2.** Elasticity of DNA in competence medium. + Experimental data for the relative end-to-end distance of DNA as a function of external force. — Fit between 0.5pN and 10pN according to the Worm Like Chain (WLC) model  $F=(k_B T/l_p)[1/4(1-l/l_0)^2-1/4+l/l_0]$  with a persistence length of  $l_p=54 \pm 5nm$ . The dotted line extends the WLC-model with  $l_p=54nm$  to higher and lower forces.  $l_0$  is the contour length of DNA. To convert positional data in measured in nm into base pairs we used the WLC between 0 and 10pN. At higher forces the experimental data is not well described by this model and we used the experimental values.
